# Supplementary material
Source: ML conference proceedings conference paper supplement (https://openreview.net/forum?id=SYuJXrXq8tw)
Supplement: supplementary_material [file gap_ablation_fre.txt_statis.xlsx]

## Sheet: Sheet1
file	generalization_gap	final_gap	diff3
igq_T500_d0.1_dr0.5_gradient_dstr0.2_b128_e5_r0.75_seed1e9ff	7.69333	18.9178	-11.2244
igq_T5000_d0.1_dr0.5_gradient_dstr0.2_b128_e5_r0.75_seed16bb5	6.18667	17.95	-11.7633
igq_T2000_d0.1_dr0.5_gradient_dstr0.2_b128_e5_r0.75_seed1be49	6.32	19.17	-12.85
igq_T100_d0.1_dr0.5_gradient_dstr0.2_b128_e5_r0.75_seed1b2e1	11.7	13.3578	-1.65778
igq_T1000_d0.1_dr0.5_gradient_dstr0.2_b128_e5_r0.75_seed1baf7	6.81222	19.8467	-13.0344
igq_T10000_d0.1_dr0.5_gradient_dstr0.2_b128_e5_r0.75_seed1a73d	6.78556	17.6356	-10.85
