# Supplementary material
Source: ML conference proceedings conference paper supplement (https://openreview.net/forum?id=SYuJXrXq8tw)
Supplement: supplementary_material [file gap_ablation_init.txt_statis.xlsx]

## Sheet: Sheet1
file	generalization_gap	final_gap	diff3
flying_resnet18_cifar10_uniform_T900_d0.1_dr0.5_gradient_p0.4_g0.05_b128_e5_r0.5_seed1cce2	6.78	15.6056	-8.82556
flying_resnet18_cifar10_snip_T900_d0.1_dr0.5_gradient_p0.4_g0.05_b128_e5_r0.5_seed1760a	6.54	15.1478	-8.60778
flying_resnet18_cifar10_fixed_ERK_T900_d0.1_dr0.5_gradient_p0.4_g0.05_b128_e5_r0.5_seed17afa	6.98778	18.64	-11.6522
flying_resnet18_cifar10_SynFlow_T900_d0.1_dr0.5_gradient_p0.4_g0.05_b128_e5_r0.5_seed196ac	5.18667	14.0956	-8.90889
