# Supplementary material
Source: ML conference proceedings conference paper supplement (https://openreview.net/forum?id=SYuJXrXq8tw)
Supplement: supplementary_material [file gap_c10_res18_remain.txt_statis.xlsx]

## Sheet: Sheet1
file	generalization_gap	final_gap	diff3
flying_resnet18_cifar10_igq_T900_d0.8_dr0.5_gradient_p0.3_g0.05_b128_e5_r0.5_seed1266c	11.0589	40.3967	-29.3378
flying_resnet18_cifar10_igq_T900_d0.6_dr0.5_gradient_p0.3_g0.05_b128_e5_r0.5_seed1ed11	7.10333	39.2956	-32.1922
