# Supplementary material
Source: ML conference proceedings conference paper supplement (https://openreview.net/forum?id=SYuJXrXq8tw)
Supplement: supplementary_material [file gap_c10_vgg.txt_statis.xlsx]

## Sheet: Sheet1
file	generalization_gap	final_gap	diff3
static_sparse_vgg16_cifar10_synflow_d0.2_b128_seed19345	7.48222	20.17	-12.6878
static_sparse_vgg16_cifar10_synflow_d0.1_b128_seed14a1b	10.8022	14.4	-3.59778
static_sparse_vgg16_cifar10_snip_d0.2_b128_seed17783	6.82111	24.7067	-17.8856
static_sparse_vgg16_cifar10_snip_d0.1_b128_seed1676c	5.58222	17.8478	-12.2656
static_sparse_vgg16_cifar10_rp_d0.2_b128_seed10137	4.85889	21.0067	-16.1478
static_sparse_vgg16_cifar10_rp_d0.1_b128_seed12349	4.49	15.4778	-10.9878
static_sparse_vgg16_cifar10_omp_d0.2_b128_seed105ef	6.49333	24.97	-18.4767
static_sparse_vgg16_cifar10_omp_d0.1_b128_seed190bd	4.96556	18.2911	-13.3256
static_sparse_vgg16_cifar10_grasp_d0.2_b128_seed1dfa2	5.88333	23.6533	-17.77
static_sparse_vgg16_cifar10_grasp_d0.1_b128_seed14bcf	6.99556	15.0367	-8.04111
flying_vgg16_cifar10_igq_T900_d0.2_dr0.5_gradient_p0.4_g0.05_b128_e5_r0.5_seed1d25c	6.96556	17.7467	-10.7811
flying_vgg16_cifar10_igq_T900_d0.1_dr0.5_gradient_p0.4_g0.05_b128_e5_r0.5_seed17a74	10.7433	12.4689	-1.72556
dst_vgg16_cifar10_d0.2_gradient_T900_b128_r0.5_85d6	7.01222	21.0133	-14.0011
dst_vgg16_cifar10_d0.1_gradient_T900_b128_r0.5_5d7e	5.55	16.5556	-11.0056
dense_vgg16_cifar10_b128_3f96	7.15333	27.9989	-20.8456
