# Supplementary material
Source: ML conference proceedings conference paper supplement (https://openreview.net/forum?id=SYuJXrXq8tw)
Supplement: supplementary_material [file gap_c10_vgg_remain.txt_statis.xlsx]

## Sheet: Sheet1
file	generalization_gap	final_gap	diff3
dst_vgg16_cifar10_d0.2_gradient_T900_b128_r0.0_80ab	6.83	22.7867	-15.9567
dst_vgg16_cifar10_d0.1_gradient_T900_b128_r0.0_b484	4.52667	16.0578	-11.5311
