# Supplementary material
Source: ML conference proceedings conference paper supplement (https://openreview.net/forum?id=SYuJXrXq8tw)
Supplement: supplementary_material [file gap_c100_vgg.txt_statis.xlsx]

## Sheet: Sheet1
file	generalization_gap	final_gap	diff3
static_sparse_vgg16_cifar100_synflow_d0.2_b128_seed1449b	7.94222	41.6989	-33.7567
static_sparse_vgg16_cifar100_synflow_d0.1_b128_seed1c381	4.40667	24.9578	-20.5511
static_sparse_vgg16_cifar100_snip_d0.2_b128_seed123e8	8.02333	40.4222	-32.3989
static_sparse_vgg16_cifar100_snip_d0.1_b128_seed16c86	13.0267	20.0233	-6.99667
static_sparse_vgg16_cifar100_rp_d0.2_b128_seed18d71	4.65333	51.1456	-46.4922
static_sparse_vgg16_cifar100_rp_d0.1_b128_seed17510	6.79667	31.3433	-24.5467
static_sparse_vgg16_cifar100_omp_d0.2_b128_seed138aa	7.25556	53.5911	-46.3356
static_sparse_vgg16_cifar100_omp_d0.1_b128_seed181dc	7.22556	38.9133	-31.6878
static_sparse_vgg16_cifar100_grasp_d0.2_b128_seed18f28	4.10667	49.71	-45.6033
static_sparse_vgg16_cifar100_grasp_d0.1_b128_seed1c2c2	6.95	29.7589	-22.8089
flying_vgg16_cifar100_igq_T900_d0.2_dr0.5_gradient_p0.4_g0.05_b128_e5_r0.5_seed1baf9	11.5733	34.6267	-23.0533
flying_vgg16_cifar100_igq_T900_d0.1_dr0.5_gradient_p0.4_g0.05_b128_e5_r0.5_seed16841	6.32444	22.1589	-15.8344
dst_vgg16_cifar100_d0.2_gradient_T900_b128_r0.5_776d	11.8733	48.1056	-36.2322
dst_vgg16_cifar100_d0.2_gradient_T900_b128_r0.0_79bd	6.80556	48.1811	-41.3756
dst_vgg16_cifar100_d0.1_gradient_T900_b128_r0.5_1505	6.94556	34.0533	-27.1078
dst_vgg16_cifar100_d0.1_gradient_T900_b128_r0.0_6f60	5.71222	27.9089	-22.1967
dense_vgg16_cifar100_b128_33df	9.78333	63.1844	-53.4011
