# Supplementary material
Source: ML conference proceedings conference paper supplement (https://openreview.net/forum?id=SYuJXrXq8tw)
Supplement: supplementary_material [file gap_dense.txt_statis.xlsx]

## Sheet: Sheet1
file	generalization_gap	final_gap	diff3
resnet18_cifar10_dense_b128_5085	10.0656	38.8156	-28.75
