# Supplementary material
Source: ML conference proceedings conference paper supplement (https://openreview.net/forum?id=SYuJXrXq8tw)
Supplement: supplementary_material [file gap_flying_dst.txt_statis.xlsx]

## Sheet: Sheet1
file	generalization_gap	final_gap	diff3
resnet18_cifar10_d0.8_gradient_T900_b128_r0.5_108c	11.2744	43.53	-32.2556
resnet18_cifar10_d0.6_gradient_T900_b128_r0.5_f47c	10.66	42.0689	-31.4089
resnet18_cifar10_d0.2_gradient_T900_b128_r0.5_7056	7.63444	28.9822	-21.3478
resnet18_cifar10_d0.1_gradient_T900_b128_r0.5_76e5	7.84889	20.1644	-12.3156
resnet18_cifar10_d0.05_gradient_T900_b128_r0.5_2453	9.89111	13.26	-3.36889
flying_resnet18_cifar10_igq_T900_d0.2_dr0.5_gradient_p0.4_g0.05_b128_e5_r0.5_seed1d846	8.42889	23.8933	-15.4644
flying_resnet18_cifar10_igq_T900_d0.1_dr0.5_gradient_p0.4_g0.05_b128_e5_r0.5_seed1ecb0	7.89444	15.1578	-7.26333
