# Supplementary material
Source: ML conference proceedings conference paper supplement (https://openreview.net/forum?id=SYuJXrXq8tw)
Supplement: supplementary_material [file gap_igq.txt_statis.xlsx]

## Sheet: Sheet1
file	generalization_gap	final_gap	diff3
dst_resnet18_cifar10_d0.8_gradient_T900_b128_r0.0_0c70	10.6233	42.8856	-32.2622
dst_resnet18_cifar10_d0.6_gradient_T900_b128_r0.0_0f26	10.3444	41.0678	-30.7233
dst_resnet18_cifar10_d0.2_gradient_T900_b128_r0.0_d72c	6.65889	25.4122	-18.7533
dst_resnet18_cifar10_d0.1_gradient_T900_b128_r0.0_3f4e	11.0589	15.9522	-4.89333
dst_resnet18_cifar10_d0.05_gradient_T900_b128_r0.0_6cc8	7.77333	9.32889	-1.55556
