# Supplementary material
Source: ML conference proceedings conference paper supplement (https://openreview.net/forum?id=SYuJXrXq8tw)
Supplement: supplementary_material [file gap_igq_grasp.txt_statis.xlsx]

## Sheet: Sheet1
file	generalization_gap	final_gap	diff3
resnet18_cifar10_static_sparse_grasp_d0.8_b128_seed179e8	8.53444	43.35	-34.8156
resnet18_cifar10_static_sparse_grasp_d0.6_b128_seed11887	9.32778	40.7533	-31.4256
resnet18_cifar10_static_sparse_grasp_d0.2_b128_seed1688a	5.72111	26.5433	-20.8222
resnet18_cifar10_static_sparse_grasp_d0.1_b128_seed150e4	6.99222	16.9322	-9.94
resnet18_cifar10_static_sparse_grasp_d0.05_b128_seed1c98b	8.24444	10.3367	-2.09222
resnet18_cifar10_dense_b128_ab4c	9.12889	44.7	-35.5711
dst_resnet18_cifar10_d0.8_gradient_T900_b128_r0.0_0c70	10.6233	42.8856	-32.2622
dst_resnet18_cifar10_d0.6_gradient_T900_b128_r0.0_0f26	10.3444	41.0678	-30.7233
dst_resnet18_cifar10_d0.2_gradient_T900_b128_r0.0_d72c	6.76	25.58	-18.82
dst_resnet18_cifar10_d0.1_gradient_T900_b128_r0.0_3f4e	11.0589	15.9522	-4.89333
dst_resnet18_cifar10_d0.05_gradient_T900_b128_r0.0_6cc8	7.78444	9.34556	-1.56111
