# Supplementary material
Source: ML conference proceedings conference paper supplement (https://openreview.net/forum?id=SYuJXrXq8tw)
Supplement: supplementary_material [file gap_omp_rp.txt_statis.xlsx]

## Sheet: Sheet1
file	generalization_gap	final_gap	diff3
resnet18_cifar10_static_sparse_rp_d0.8_b128_seed14322	10.5144	43.25	-32.7356
resnet18_cifar10_static_sparse_rp_d0.6_b128_seed1d428	9.7	40.8578	-31.1578
resnet18_cifar10_static_sparse_rp_d0.2_b128_seed1048c	6.14556	26.1489	-20.0033
resnet18_cifar10_static_sparse_rp_d0.1_b128_seed1f91f	5.22	15.3022	-10.0822
resnet18_cifar10_static_sparse_rp_d0.05_b128_seed146bb	6.46222	8.00889	-1.54667
resnet18_cifar10_static_sparse_omp_d0.8_b128_seed13813	8.73667	42.9856	-34.2489
resnet18_cifar10_static_sparse_omp_d0.6_b128_seed11458	10.3433	40.98	-30.6367
resnet18_cifar10_static_sparse_omp_d0.2_b128_seed16016	7.97	28.5611	-20.5911
resnet18_cifar10_static_sparse_omp_d0.1_b128_seed1b230	5.61222	18.8822	-13.27
resnet18_cifar10_static_sparse_omp_d0.05_b128_seed1b835	8.60556	11.8856	-3.28
