# Supplementary material
Source: ML conference proceedings conference paper supplement (https://openreview.net/forum?id=SYuJXrXq8tw)
Supplement: supplementary_material [file gap_omprp.txt_statis.xlsx]

## Sheet: Sheet1
file	generalization_gap	final_gap	diff3
resnet18_cifar10_static_sparse_rp_d0.8_b128_seed14322	10.5144	43.25	-32.7356
resnet18_cifar10_static_sparse_rp_d0.6_b128_seed1d428	9.7	40.8578	-31.1578
resnet18_cifar10_static_sparse_rp_d0.2_b128_seed1048c	6.03444	25.7022	-19.6678
resnet18_cifar10_static_sparse_rp_d0.1_b128_seed1f91f	5.25111	15.11	-9.85889
resnet18_cifar10_static_sparse_rp_d0.05_b128_seed146bb	6.45333	7.95556	-1.50222
resnet18_cifar10_static_sparse_omp_d0.8_b128_seed13813	8.73667	42.9856	-34.2489
resnet18_cifar10_static_sparse_omp_d0.6_b128_seed11458	10.3433	40.98	-30.6367
resnet18_cifar10_static_sparse_omp_d0.2_b128_seed16016	7.80889	28.3811	-20.5722
resnet18_cifar10_static_sparse_omp_d0.1_b128_seed1b230	5.70222	19.0489	-13.3467
resnet18_cifar10_static_sparse_omp_d0.05_b128_seed1b835	8.61556	12.0078	-3.39222
