# Supplementary material
Source: ML conference proceedings conference paper supplement (https://openreview.net/forum?id=SYuJXrXq8tw)
Supplement: supplementary_material [file gap_pi.txt_statis.xlsx]

## Sheet: Sheet1
file	generalization_gap	final_gap	diff3
static_sparse_resnet18_cifar10_synflow_d0.8_b128_seed1e5af	10.1789	41.05	-30.8711
static_sparse_resnet18_cifar10_synflow_d0.6_b128_seed18d0f	9.94778	40.2	-30.2522
static_sparse_resnet18_cifar10_synflow_d0.2_b128_seed1c5e9	5.34889	24.66	-19.3111
static_sparse_resnet18_cifar10_synflow_d0.1_b128_seed1f6a9	12.0022	14.68	-2.67778
static_sparse_resnet18_cifar10_synflow_d0.05_b128_seed1653f	7.34667	8.24889	-0.902222
resnet18_cifar10_static_sparse_snip_d0.8_b128_seed18ad0	10.5289	42.9311	-32.4022
resnet18_cifar10_static_sparse_snip_d0.6_b128_seed12dc2	9.52111	40.8756	-31.3544
resnet18_cifar10_static_sparse_snip_d0.2_b128_seed1e80f	7.61222	25.2356	-17.6233
resnet18_cifar10_static_sparse_snip_d0.1_b128_seed1c641	4.24667	16.1956	-11.9489
resnet18_cifar10_static_sparse_snip_d0.05_b128_seed19128	7.77333	9.58222	-1.80889
resnet18_cifar10_static_sparse_grasp_d0.8_b128_seed179e8	8.55444	43.3667	-34.8122
resnet18_cifar10_static_sparse_grasp_d0.6_b128_seed11887	9.55667	40.4678	-30.9111
resnet18_cifar10_static_sparse_grasp_d0.2_b128_seed1688a	5.79889	26.2822	-20.4833
resnet18_cifar10_static_sparse_grasp_d0.1_b128_seed150e4	7.05667	16.8022	-9.74556
resnet18_cifar10_static_sparse_grasp_d0.05_b128_seed1c98b	8.37111	10.3744	-2.00333
