# Supplementary material
Source: ML conference proceedings conference paper supplement (https://openreview.net/forum?id=SYuJXrXq8tw)
Supplement: supplementary_material [file gap_res18_c100_remain.txt_statis.xlsx]

## Sheet: Sheet1
file	generalization_gap	final_gap	diff3
static_sparse_resnet18_cifar100_synflow_d0.2_b128_seed1592f	3.60778	20.29	-16.6822
static_sparse_resnet18_cifar100_synflow_d0.1_b128_seed153f7	8.03667	10.3844	-2.34778
static_sparse_resnet18_cifar100_snip_d0.2_b128_seed173cc	4.11889	23.6933	-19.5744
static_sparse_resnet18_cifar100_snip_d0.1_b128_seed1a21e	8.68889	11.5422	-2.85333
static_sparse_resnet18_cifar100_omp_d0.2_b128_seed18272	7.68778	28.5656	-20.8778
static_sparse_resnet18_cifar100_omp_d0.1_b128_seed11dae	5.89111	17.1078	-11.2167
dst_resnet18_cifar100_d0.2_gradient_T900_b128_r0.0_7469	4.63111	27.0389	-22.4078
dst_resnet18_cifar100_d0.1_gradient_T900_b128_r0.0_7446	10.1111	13.8978	-3.78667
