# Supplementary material
Source: ML conference proceedings conference paper supplement (https://openreview.net/forum?id=SYuJXrXq8tw)
Supplement: supplementary_material [file gap_small_dense_statis.xlsx]

## Sheet: Sheet1
file	generalization_gap	final_gap	diff3
resnet18_cifar100_smalldense0.2_b128_a7c9	16.2267	21.9267	-5.7
resnet18_cifar100_smalldense0.1_b128_71a7	9.30111	11.18	-1.87889
