# Supplementary material
Source: ML conference proceedings conference paper supplement (https://openreview.net/forum?id=SYuJXrXq8tw)
Supplement: supplementary_material [file gap_snip_synflow.txt_statis.xlsx]

## Sheet: Sheet1
file	generalization_gap	final_gap	diff3
static_sparse_resnet18_cifar10_synflow_d0.8_b128_seed1e5af	10.2589	41	-30.7411
static_sparse_resnet18_cifar10_synflow_d0.6_b128_seed18d0f	9.88111	40.1178	-30.2367
static_sparse_resnet18_cifar10_synflow_d0.2_b128_seed1c5e9	5.40667	24.6333	-19.2267
static_sparse_resnet18_cifar10_synflow_d0.1_b128_seed1f6a9	11.8111	14.6167	-2.80556
static_sparse_resnet18_cifar10_synflow_d0.05_b128_seed1653f	7.13667	8.29111	-1.15444
resnet18_cifar10_static_sparse_snip_d0.8_b128_seed18ad0	10.2811	42.8489	-32.5678
resnet18_cifar10_static_sparse_snip_d0.6_b128_seed12dc2	9.61667	40.8189	-31.2022
resnet18_cifar10_static_sparse_snip_d0.2_b128_seed1e80f	7.69222	25.2178	-17.5256
resnet18_cifar10_static_sparse_snip_d0.1_b128_seed1c641	4.41444	15.9989	-11.5844
resnet18_cifar10_static_sparse_snip_d0.05_b128_seed19128	7.83222	9.42778	-1.59556
