# Supplementary material
Source: ML conference proceedings conference paper supplement (https://openreview.net/forum?id=SYuJXrXq8tw)
Supplement: supplementary_material [file res_batch_statis.xlsx]

## Sheet: Sheet1
file	best_ra	final_ra	diff1	best_sa	final_sa	diff2	val_best	final	diff3
resnet18_cifar10_d0.1_random_T1000_b64_0585	49.42	46.75	2.67	81.14	80.38	0.76	10.9667	15.8389	-4.87222
resnet18_cifar10_d0.1_random_T1000_b512_0388	48.51	45.56	2.95	79.01	80.8	-1.79	7.32556	19.34	-12.0144
resnet18_cifar10_d0.1_random_T1000_b32_fa24	49.62	48.57	1.05	79.97	79.67	0.3	7.79111	9.43667	-1.64556
resnet18_cifar10_d0.1_random_T1000_b256_72f2	50.01	46.4	3.61	80.18	81.93	-1.75	8.12333	19.9356	-11.8122
resnet18_cifar10_d0.1_random_T1000_b128_290b	50.86	47.44	3.42	80.13	82.17	-2.04	5.38889	17.8978	-12.5089
