# Supplementary material
Source: ML conference proceedings conference paper supplement (https://openreview.net/forum?id=SYuJXrXq8tw)
Supplement: supplementary_material [file res_dr_statis.xlsx]

## Sheet: Sheet1
file	best_ra	final_ra	diff1	best_sa	final_sa	diff2	val_best	final	diff3
resnet18_cifar10_d0.1_random_T1000_b128_r0.2_f2bf	49.25	46.81	2.44	79.67	82.02	-2.35	6.56333	17.9722	-11.4089
resnet18_cifar10_d0.1_random_T1000_b128_r0.0_cdd9	47.84	47.7	0.14	80.66	80.51	0.15	11.8756	12.5533	-0.677778
