# Supplementary material
Source: ML conference proceedings conference paper supplement (https://openreview.net/forum?id=SYuJXrXq8tw)
Supplement: supplementary_material [file res_fre_statis.xlsx]

## Sheet: Sheet1
file	best_ra	final_ra	diff1	best_sa	final_sa	diff2	val_best	final	diff3
resnet18_cifar10_d0.1_random_T900_b128_e357	50.22	47.3	2.92	80.58	82.19	-1.61	5.62667	17.3756	-11.7489
resnet18_cifar10_d0.1_random_T500_b128_4ba6	48.72	48.51	0.21	78.81	79.64	-0.83	7.70222	9.67667	-1.97444
resnet18_cifar10_d0.1_random_T3000_b128_94cd	49.37	47.49	1.88	79.56	81.45	-1.89	5.23667	15.9144	-10.6778
resnet18_cifar10_d0.1_random_T2000_b128_20d4	49.22	47.45	1.77	81.57	82.47	-0.9	13.0689	17.2389	-4.17
resnet18_cifar10_d0.1_random_T1500_b128_d96d	50.18	48.08	2.1	79.15	81.45	-2.3	6.17333	17.1067	-10.9333
resnet18_cifar10_d0.1_random_T1250_b128_4403	50.47	46.69	3.78	80.27	82.38	-2.11	5.45667	18.5278	-13.0711
resnet18_cifar10_d0.1_random_T1100_b128_08ad	50.19	47.43	2.76	79.08	82.12	-3.04	4.09444	17.6033	-13.5089
resnet18_cifar10_d0.1_random_T1000_b128_290b	50.86	47.44	3.42	80.13	82.17	-2.04	5.38889	17.8978	-12.5089
resnet18_cifar10_d0.1_gradient_T1500_b128_176e	50.18	47.89	2.29	79.5	81.96	-2.46	5.42444	16.6233	-11.1989
