# Supplementary material
Source: ML conference proceedings conference paper supplement (https://openreview.net/forum?id=SYuJXrXq8tw)
Supplement: supplementary_material [file res_s_0.1_statis.xlsx]

## Sheet: Sheet1
file	best_ra	final_ra	diff1	best_sa	final_sa	diff2	val_best	final	diff3
resnet18_cifar10_static_sparse_gmp_d0.1_b128_f5fa	50.63	43.82	6.81	80.79	81.77	-0.98	8.74333	22.5022	-13.7589
resnet18_cifar10_static_sparse_omp_d0.1_b128_3a41	51.49	44.24	7.25	80.78	83.45	-2.67	6.16556	37.1778	-31.0122
resnet18_cifar10_static_sparse_rp_d0.1_b128_d78e	51.31	43.31	8	81.09	82.9	-1.81	7.60111	37.53	-29.9289
resnet18_cifar10_static_sparse_snip_d0.1_b128_99a3	51.5	44.15	7.35	80.64	83.44	-2.8	7.56889	37.2389	-29.67
resnet18_cifar10_static_sparse_tp_d0.1_b128_47fd	50.97	43.84	7.13	80.17	83.15	-2.98	6.82111	37.4778	-30.6567
