# Supplementary material
Source: ML conference proceedings conference paper supplement (https://openreview.net/forum?id=SYuJXrXq8tw)
Supplement: supplementary_material [file res_s_0.2_statis.xlsx]

## Sheet: Sheet1
file	best_ra	final_ra	diff1	best_sa	final_sa	diff2	val_best	final	diff3
resnet18_cifar10_static_sparse_gmp_d0.2_b128_61db	50.99	45.53	5.46	81.45	82.07	-0.62	7.33	26.1544	-18.8244
resnet18_cifar10_static_sparse_omp_d0.2_b128_66f7	51.81	43.46	8.35	81.55	83.41	-1.86	7.89667	38.2133	-30.3167
resnet18_cifar10_static_sparse_rp_d0.2_b128_ae53	50.84	43	7.84	81.12	83.43	-2.31	6.12	38.5178	-32.3978
resnet18_cifar10_static_sparse_snip_d0.2_b128_0f0e	51.41	43.92	7.49	80.91	83.11	-2.2	6.23889	37.7311	-31.4922
resnet18_cifar10_static_sparse_tp_d0.2_b128_46c4	51.16	42.92	8.24	81.36	83.31	-1.95	9.46444	38.5644	-29.1
