# Supplementary material
Source: ML conference proceedings conference paper supplement (https://openreview.net/forum?id=SYuJXrXq8tw)
Supplement: supplementary_material [file res_s_0.05_statis.xlsx]

## Sheet: Sheet1
file	best_ra	final_ra	diff1	best_sa	final_sa	diff2	val_best	final	diff3
resnet18_cifar10_static_sparse_gmp_d0.05_b128_4302	49.4	46	3.4	79.22	81.49	-2.27	4.77556	15.4378	-10.6622
resnet18_cifar10_static_sparse_omp_d0.05_b128_5298	51.24	43.4	7.84	81.45	83.54	-2.09	8.56444	37.7711	-29.2067
resnet18_cifar10_static_sparse_rp_d0.05_b128_f7aa	50.98	43.08	7.9	81.23	83.18	-1.95	9.42889	38.6022	-29.1733
resnet18_cifar10_static_sparse_snip_d0.05_b128_e910	50.87	43.6	7.27	79.91	83.22	-3.31	7.37	35.2978	-27.9278
resnet18_cifar10_static_sparse_tp_d0.05_b128_0d11	51.34	43.42	7.92	80.7	83.37	-2.67	8.24	37.9089	-29.6689
