# Supplementary material
Source: ML conference proceedings conference paper supplement (https://openreview.net/forum?id=SYuJXrXq8tw)
Supplement: supplementary_material [file res_s_0.6_statis.xlsx]

## Sheet: Sheet1
file	best_ra	final_ra	diff1	best_sa	final_sa	diff2	val_best	final	diff3
resnet18_cifar10_static_sparse_gmp_d0.6_b128_1374	51.29	44.83	6.46	80.45	83.27	-2.82	8.36111	34.6922	-26.3311
resnet18_cifar10_static_sparse_omp_d0.6_b128_7c7c	51.27	44.66	6.61	81.25	83.33	-2.08	7.89222	37.2333	-29.3411
resnet18_cifar10_static_sparse_rp_d0.6_b128_c75a	51.85	43.96	7.89	80.34	83.15	-2.81	6.00333	37.8844	-31.8811
resnet18_cifar10_static_sparse_snip_d0.6_b128_b388	51.01	44.24	6.77	80.28	83.14	-2.86	5.91889	37.9511	-32.0322
resnet18_cifar10_static_sparse_tp_d0.6_b128_f907	51.05	43.02	8.03	81.87	83.81	-1.94	10.1122	39.0444	-28.9322
