# Supplementary material
Source: ML conference proceedings conference paper supplement (https://openreview.net/forum?id=SYuJXrXq8tw)
Supplement: supplementary_material [file res_s_0.8_statis.xlsx]

## Sheet: Sheet1
file	best_ra	final_ra	diff1	best_sa	final_sa	diff2	val_best	final	diff3
resnet18_cifar10_static_sparse_gmp_d0.8_b128_a2a3	51.16	44.22	6.94	81.82	82.45	-0.63	9.23111	36.8578	-27.6267
resnet18_cifar10_static_sparse_omp_d0.8_b128_5e6c	51.26	44.53	6.73	81.83	83.22	-1.39	9.66667	37.1678	-27.5011
resnet18_cifar10_static_sparse_rp_d0.8_b128_6f15	51.39	43.08	8.31	80.91	83.92	-3.01	6.59889	38.9356	-32.3367
resnet18_cifar10_static_sparse_snip_d0.8_b128_ba2b	50.9	43.7	7.2	81.03	83.77	-2.74	7.79778	38.2711	-30.4733
resnet18_cifar10_static_sparse_tp_d0.8_b128_74ff	50.63	43.55	7.08	81.01	82.96	-1.95	8.97667	38.3789	-29.4022
