# Supplementary material
Source: ML conference proceedings conference paper supplement (https://openreview.net/forum?id=SYuJXrXq8tw)
Supplement: supplementary_material [file res_statis.xlsx]

## Sheet: Sheet1
file	best_ra	final_ra	diff1	best_sa	final_sa	diff2	val_best	final	diff3
resnet18_cifar10_dense_b128_5085	51.1	43.61	7.49	81.15	83.38	-2.23	8.48889	38.53	-30.0411
resnet18_cifar10_density1.0_random_293c	51.49	43.78	7.71	81.47	84.2	-2.73	7.03444	38.0311	-30.9967
resnet18_cifar10_density1.0_gradient_ea74	51.22	43.14	8.08	81.63	82.61	-0.98	9.32667	38.54	-29.2133
resnet18_cifar10_density0.8_random_b7fb	51.47	44.17	7.3	81.36	83.23	-1.87	8.41889	36.7833	-28.3644
resnet18_cifar10_density0.8_gradient_83bb	51.19	44.04	7.15	81.53	83.39	-1.86	8.24778	36.6867	-28.4389
resnet18_cifar10_density0.6_random_0627	51.47	44.71	6.76	80.6	83.19	-2.59	5.23889	34.7678	-29.5289
resnet18_cifar10_density0.6_gradient_2db9	51.61	44.13	7.48	80.64	83.45	-2.81	6.30111	34.2989	-27.9978
resnet18_cifar10_density0.2_random_e9ae	50.86	46.41	4.45	80.31	82.82	-2.51	6.18889	24.4544	-18.2656
resnet18_cifar10_density0.2_gradient_21aa	50.53	46.37	4.16	79.69	82.43	-2.74	6.89444	22.6056	-15.7111
resnet18_cifar10_d0.1_random_T100_b128_a4d3	50.32	46.36	3.96	79.3	81.73	-2.43	5.98	18.5622	-12.5822
resnet18_cifar10_d0.1_gradient_T100_b128_06b7	49.94	48.26	1.68	79.08	81.56	-2.48	4.65111	14.8356	-10.1844
resnet18_cifar10_density0.05_random_5492	48.92	48.14	0.78	78.43	80.4	-1.97	4.22667	10.9844	-6.75778
resnet18_cifar10_density0.05_gradient_4037	49.04	48.03	1.01	79.16	80.26	-1.1	7.7	9.64778	-1.94778
