# Supplementary material
Source: ML conference proceedings conference paper supplement (https://openreview.net/forum?id=SYuJXrXq8tw)
Supplement: supplementary_material [file res_test_statis.xlsx]

## Sheet: Sheet1
file	best_ra	final_ra	diff1	best_sa	final_sa	diff2	val_best	final	diff3
resnet18_cifar10_d0.2_random_T1000_b128_r0.5_4b3d	51.06	45.44	5.62	80.38	82.55	-2.17	7.74222	26.3689	-18.6267
resnet18_cifar10_d0.2_gradient_T1000_b128_r0.5_fb68	50.98	46.03	4.95	80.82	83.67	-2.85	7.00444	24.9056	-17.9011
resnet18_cifar10_d0.1_random_T1000_b128_290b	50.86	47.44	3.42	80.13	82.17	-2.04	5.38889	17.8978	-12.5089
resnet18_cifar10_d0.1_gradient_T1000_b128_r0.5_712c	50.42	47.12	3.3	78.61	82.65	-4.04	5.16222	17.3333	-12.1711
resnet18_cifar10_d0.05_random_T1000_b128_r0.5_caa1	50.13	47.73	2.4	79.73	81.07	-1.34	7.36111	11.5233	-4.16222
resnet18_cifar10_d0.05_gradient_T1000_b128_r0.5_0ae1	49.52	48.2	1.32	79.97	80.37	-0.4	8.42222	10.7	-2.27778
